# Supplementary material
Source: PubMed Central journal article supplement (PMC6612469)

## Supplemental Figures

Figure 1A: Funnel plot of publication bias: Two dose versus single dose protocols.

Points refer to individual study results. Dotted lines refer to 95% confidence interval.

The symmetric nature of the dots about the solid vertical line (representing the average association measure) indicates lack of publication bias.

Figure 1B: Funnel plot of publication bias: Multi-dose versus single dose protocols.

Points refer to individual study results. Dotted lines refer to 95% confidence interval.

The symmetric nature of the dots about the solid vertical line (representing the average association measure) indicates lack of publication bias.

Funnel Plot for Two vs. Single  
Funnel plot with pseudo 95% confidence limits

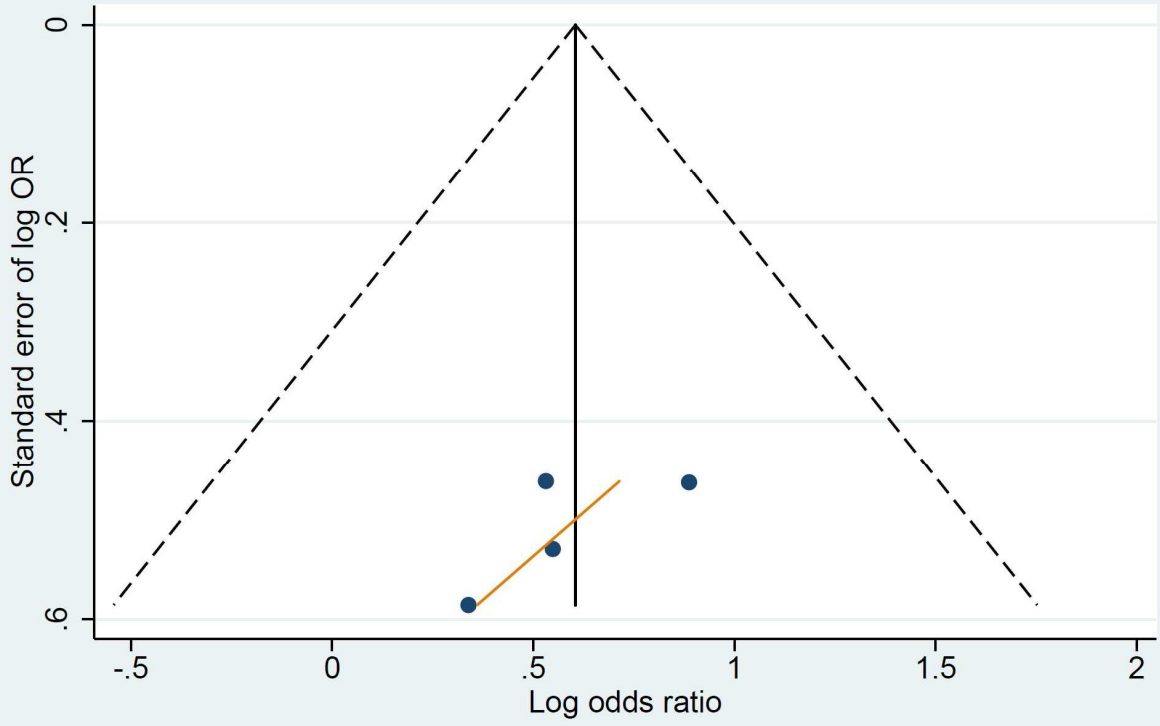

# Funnel Plot for Multi vs. Single

Funnel plot with pseudo 95% confidence limits

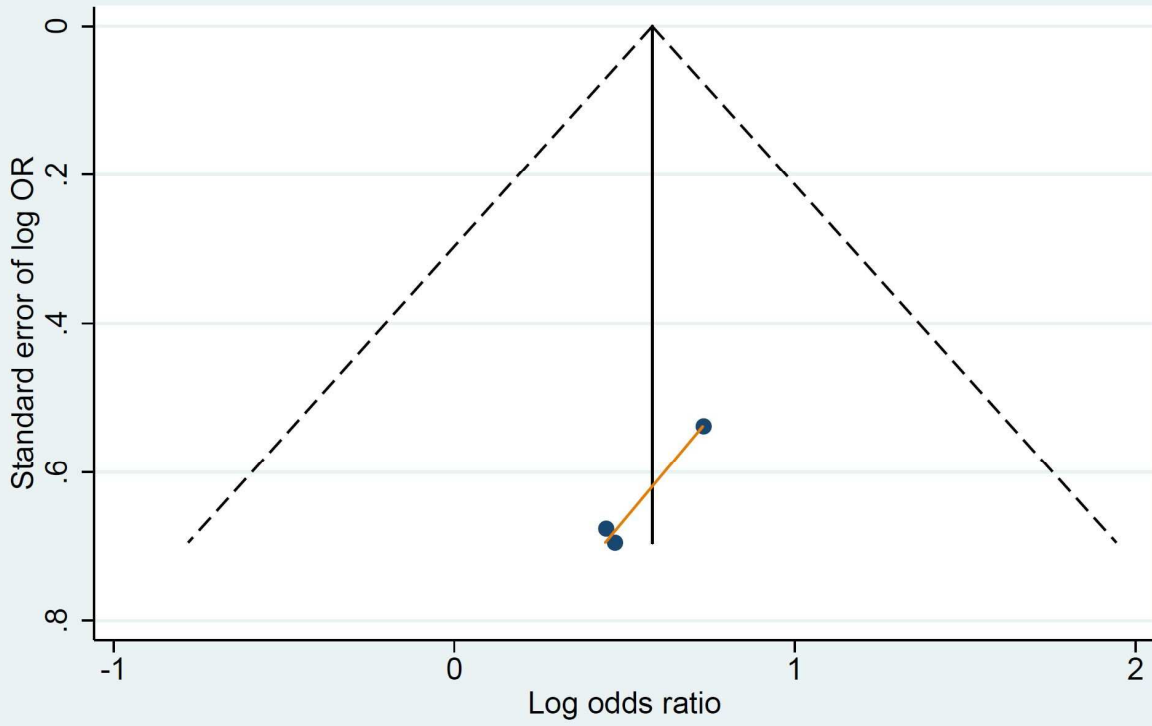

Supplement: NIHMS1518117-supplement-1.pdf [file NIHMS1518117-supplement-1.pdf]
